# Supplementary material for: Copper dithiolene [Cu(SC6H2Cl2S)2]− units connected to alkaline/copper complexes: from ionic assemblies to discrete molecular entities and coordination polymers
Source: Royal Society of Chemistry journal article supplement (doi:10.1039/c8ce01594e), 2018-11-21
Supplement: c8ce01594e1.pdf [file c8ce01594e1.pdf]

## **ELECTRONIC SUPPLEMENTARY INFORMATION**

### **Copper Dithiolene [Cu(SC<sub>6</sub>H<sub>2</sub>Cl<sub>2</sub>S)<sub>2</sub>]<sup>-</sup> Units Connected to Alkaline/Copper Complexes: From Ionic Assemblies to Discrete Molecular Entities and Coordination Polymers**

Pilar Amo-Ochoa,<sup>a</sup> Oscar Castillo,<sup>b</sup> Esther Delgado,<sup>a\*</sup> Ana Gallut,<sup>a</sup> Elisa Hernández,<sup>a</sup> Josefina Perles,<sup>c</sup> and Félix Zamora<sup>a,d\*</sup>

<sup>a</sup>Departamento de Química Inorgánica, Universidad Autónoma de Madrid, 28049 Madrid, Spain. <sup>b</sup>Departamento de Química Inorgánica, Universidad del País Vasco (UPV/EHU), Apartado 644, 48080 Bilbao, Spain. <sup>c</sup>Laboratorio de DRX de Monocristal, Servicio Interdepartamental de Investigación. Universidad Autónoma de Madrid, 28049, Spain. <sup>d</sup>Instituto Madrileño de Estudios Avanzados en Nanociencia (IMDEA Nanociencia), Cantoblanco, 28049 Madrid, Spain.

**Table S1.** Selected coordination bond distances (Å) for **1** (CCDC 1590257).

|                     |           |                      |          |
|---------------------|-----------|----------------------|----------|
| Cu1-S1              | 2.1718(5) | Na1-O1               | 2.345(2) |
| Cu1-S1 <sup>i</sup> | 2.1719(5) | Na1-O1 <sup>ii</sup> | 2.345(2) |
| Cu1-S2              | 2.1861(5) | Na1-O2               | 2.423(2) |
| Cu1-S2 <sup>i</sup> | 2.1862(5) | Na1-O2 <sup>ii</sup> | 2.423(2) |
|                     |           | Na1-O3               | 2.339(3) |
|                     |           | Na1-O4               | 2.320(3) |

Symmetry codes: i)  $-x+1/2, -y+1/2, -z$ ; ii)  $-x, y, -z+1/2$ .**Table S2.** Selected coordination bond distances (Å) for **2** (CCDC 1590258).

|                     |          |                     |          |
|---------------------|----------|---------------------|----------|
| Cu1-S1              | 2.170(1) | K1-O1               | 2.715(4) |
| Cu1-S1 <sup>i</sup> | 2.170(1) | K1-O1 <sup>ii</sup> | 2.715(4) |
| Cu1-S2              | 2.173(1) | K1-O2               | 2.690(4) |
| Cu1-S2 <sup>i</sup> | 2.173(1) | K1-O2 <sup>ii</sup> | 2.690(4) |
|                     |          | K1-O3               | 2.694(7) |
|                     |          | K1-O3 <sup>ii</sup> | 2.320(3) |

Symmetry codes: i)  $-x+1, -y+1, -z+1$ ; ii)  $-x+2, -y, -z+1$ .**Table S3.** Selected coordination bond distances (Å) for **3** (CCDC 1590261).

|                     |          |                       |          |
|---------------------|----------|-----------------------|----------|
| Cu1-S1              | 2.177(1) | Rb1-O1                | 2.793(9) |
| Cu1-S1 <sup>i</sup> | 2.177(1) | Rb1-O1 <sup>ii</sup>  | 3.04(1)  |
| Cu1-S2              | 2.171(1) | Rb1-S1                | 3.364(2) |
| Cu1-S2 <sup>i</sup> | 2.171(1) | Rb1-S2 <sup>iii</sup> | 3.381(2) |
|                     |          | Rb1-S2 <sup>iv</sup>  | 3.442(2) |
|                     |          | Rb1-Cl1               | 3.270(2) |
|                     |          | Rb1-Cl2 <sup>v</sup>  | 3.458(2) |

Symmetry codes: i)  $-x, -y, -z$ ; ii)  $-x, y-1, -z+1/2$ ; iii)  $x, -y+1, z-1/2$ ; iv)  $x, -y, z-1/2$ ; v)  $x, -y+1, z+1/2$ .**Table S4.** Selected coordination bond distances (Å) for **4** (CCDC 1590262).

|                     |          |                        |          |
|---------------------|----------|------------------------|----------|
| Cu1-S1              | 2.176(1) | Cs1-O1                 | 2.898(7) |
| Cu1-S1 <sup>i</sup> | 2.176(1) | Cs1-S1                 | 3.653(1) |
| Cu1-S2              | 2.181(1) | Cs1-S1 <sup>ii</sup>   | 3.653(1) |
| Cu1-S2 <sup>i</sup> | 2.181(1) | Cs1-S2 <sup>iii</sup>  | 3.632(1) |
|                     |          | Cs1-S2 <sup>iv</sup>   | 3.632(1) |
|                     |          | Cs1-Cl1                | 3.582(1) |
|                     |          | Cs1-Cl1 <sup>ii</sup>  | 3.582(1) |
|                     |          | Cs1-Cl2 <sup>iii</sup> | 3.744(1) |
|                     |          | Cs1-Cl2 <sup>iv</sup>  | 3.744(1) |

Symmetry codes: i)  $-x+1, y, -z+1/2$ ; ii)  $-x, y, -z-1/2$ ; iii)  $-x, -y+2, -z$ ; iv)  $x, -y+2, z-1/2$ .

**Table S5.** Selected coordination bond distances (Å) for **5** (CCDC 1590259).

|                        |           |        |          |
|------------------------|-----------|--------|----------|
| Cu1-S1                 | 2.174(1)  | Cu2-S5 | 2.171(2) |
| Cu1-S2                 | 2.167(2)  | Cu2-S6 | 2.186(1) |
| Cu1-S3                 | 2.190(2)  | Cu2-S7 | 2.188(1) |
| Cu1-S4                 | 2.176(1)  | Cu2-S8 | 2.195(2) |
|                        |           |        |          |
| Cu3-N1                 | 1.979(5)  | Cu4-N4 | 1.988(5) |
| Cu3-N2                 | 1.974(5)  | Cu4-S6 | 2.470(2) |
| Cu3-N3                 | 1.989(6)  | Cu4-S7 | 2.267(1) |
| Cu3-S3                 | 2.395(2)  | Cu4-S8 | 2.378(1) |
|                        |           |        |          |
| Cu2...Cu4 <sup>i</sup> | 2.6895(9) |        |          |

Symmetry codes: i)  $-x+1, -y+1, -z+1$ .**Table S6.** Selected coordination bond distances (Å) for **6** (CCDC 1590260).

|                     |          |                      |          |
|---------------------|----------|----------------------|----------|
| Cu1-S1              | 2.178(1) | K1-S1                | 3.343(3) |
| Cu1-S1 <sup>i</sup> | 2.178(1) | K1-S1 <sup>ii</sup>  | 3.689(3) |
| Cu1-S2              | 2.172(1) | K1-S2 <sup>iii</sup> | 3.271(4) |
| Cu1-S2 <sup>i</sup> | 2.172(1) | K1-S2 <sup>iv</sup>  | 2.195(2) |
|                     |          | K1-Cl1               | 3.218(3) |
|                     |          | K1-Cl2 <sup>iv</sup> | 3.410(3) |
|                     |          | K1-O1 <sup>v</sup>   | 3.01(1)  |

Symmetry codes: i)  $-x, -y, -z$ ; ii)  $-x, y, -z+1/2$ ; iii)  $x, -y, z+1/2$ ; iv)  $x, -y+1, z+1/2$ ; v)  $x, y-1, z$ .

**Table S7.** Crystallographic data and structure refinement details of compounds **1-6**.

|                                   | <b>1</b>                                             | <b>2</b>                                            | <b>3</b>                                           | <b>4</b>                                            | <b>5</b>                                                           | <b>6</b>                                           |
|-----------------------------------|------------------------------------------------------|-----------------------------------------------------|----------------------------------------------------|-----------------------------------------------------|--------------------------------------------------------------------|----------------------------------------------------|
| Formula                           | C <sub>36</sub> H <sub>52</sub> Cl <sub>4</sub> CuNa | C <sub>36</sub> H <sub>52</sub> Cl <sub>4</sub> CuK | C <sub>12</sub> H <sub>6</sub> Cl <sub>4</sub> CuO | C <sub>12</sub> H <sub>6</sub> Cl <sub>4</sub> CsCu | C <sub>68</sub> H <sub>46</sub> Cl <sub>16</sub> Cu <sub>8</sub> N | C <sub>12</sub> H <sub>6</sub> Cl <sub>4</sub> CuK |
| M                                 | O <sub>6</sub> S <sub>4</sub><br>937.34 g/mol        | O <sub>6</sub> S <sub>4</sub><br>953.50 g/mol       | RbS <sub>4</sub><br>585.22 g/mol                   | OS <sub>4</sub><br>632.66 g/mol                     | <sup>10</sup> S <sub>16</sub><br>2591.63 g/mol                     | OS <sub>4</sub><br>538.85 g/mol                    |
| Temperatur                        | 100(2) K                                             | 200(2) K                                            | 200(2) K                                           | 200(2) K                                            | 200(2) K                                                           | 200(2) K                                           |
| Crystal                           | monoclinic                                           | monoclinic                                          | monoclinic                                         | monoclinic                                          | monoclinic                                                         | monoclinic                                         |
| Space group                       | <i>C2/c</i>                                          | <i>P2<sub>1</sub>/n</i>                             | <i>C2/c</i>                                        | <i>C2/c</i>                                         | <i>P2<sub>1</sub>/n</i>                                            | <i>C2/c</i>                                        |
| a/Å                               | 21.8050(6)                                           | 12.2137(4)                                          | 26.295(4)                                          | 10.3169(7)                                          | 7.827(1)                                                           | 26.271(1)                                          |
| b/Å                               | 12.6126(4)                                           | 12.4992(5)                                          | 3.9413(7)                                          | 26.745(2)                                           | 13.197(1)                                                          | 3.9461(2)                                          |
| c/Å                               | 16.2518(5)                                           | 15.7574(5)                                          | 17.479(3)                                          | 7.6185(5)                                           | 44.680(7)                                                          | 17.3670(7)                                         |
| β/°                               | 107.833(1)                                           | 109.812(2)                                          | 102.299(6)                                         | 119.840(4)                                          | 92.759(5)                                                          | 102.370(2)°                                        |
| U/ Å <sup>3</sup>                 | 4254.8(2)                                            | 2263.2(1)                                           | 1769.9(5)                                          | 1823.4(2)                                           | 4609(1)                                                            | 1758.6(1)                                          |
| Z                                 | 4                                                    | 2                                                   | 4                                                  | 4                                                   | 2                                                                  | 4                                                  |
| D <sub>c</sub> /Mgm <sup>-3</sup> | 1.463                                                | 1.399                                               | 2.196                                              | 2.305                                               | 1.867                                                              | 2.035                                              |
| μ/ mm <sup>-1</sup>               | 1.013                                                | 1.035                                               | 5.038                                              | 4.206                                               | 2.682                                                              | 2.557                                              |
| F(000)                            | 1952                                                 | 992                                                 | 112836                                             | 1208                                                | 2568                                                               | 1064                                               |
| Goodness of                       | 1.104                                                | 1.043                                               | 0.990                                              | 1.031                                               | 1.011                                                              | 1.120                                              |
| Reflections                       | 44431                                                | 72277                                               | 12869                                              | 14339                                               | 37393                                                              | 13226                                              |
| Independen                        | 5279 [R(int) =                                       | 4129 [R(int) =                                      | 1600 [R(int) =                                     | 1655 [R(int) =                                      | 8452 [R(int) =                                                     | 1612 [R(int)                                       |
| t reflections                     | 0.0284]                                              | 0.0778]                                             | 0.1101]                                            | 0.0467]                                             | 0.0948]                                                            | = 0.0708]                                          |
| R indices                         | R <sub>1</sub> =0.0344,                              | R <sub>1</sub> =0.0536,                             | R <sub>1</sub> =0.0407,                            | R <sub>1</sub> =0.0298,                             | R <sub>1</sub> =0.0491,                                            | R <sub>1</sub> =0.0396,                            |
| [I>2σ(I)]                         | wR <sub>2</sub> = 0.0911                             | wR <sub>2</sub> = 0.1388                            | wR <sub>2</sub> = 0.0768                           | wR <sub>2</sub> = 0.0664                            | wR <sub>2</sub> = 0.0885                                           | wR <sub>2</sub> = 0.0816                           |
| R indices                         | R <sub>1</sub> =0.0437, wR <sub>2</sub>              | R <sub>1</sub> =0.0910,                             | R <sub>1</sub> =0.0938,                            | R <sub>1</sub> =0.0380,                             | R <sub>1</sub> =0.0913, wR <sub>2</sub>                            | R <sub>1</sub> =0.0564,                            |
| (all data)                        | = 0.1085                                             | wR <sub>2</sub> = 0.1661                            | wR <sub>2</sub> = 0.0922                           | wR <sub>2</sub> = 0.0699                            | = 0.1558040                                                        | wR <sub>2</sub> = 0.0898                           |
| Residual                          | 0.956 and -                                          | 0.782 and -                                         | 0.516 and -                                        | 2.021 and -                                         | 0.940 and -                                                        | 0.294 and -                                        |
| electron                          | 0.772                                                | 0.348                                               | 0.558                                              | 0.687                                               | 0.807                                                              | 0.388                                              |
| density                           |                                                      |                                                     |                                                    |                                                     |                                                                    |                                                    |
| (max, min)                        |                                                      |                                                     |                                                    |                                                     |                                                                    |                                                    |
| (eÅ <sup>-3</sup> )               |                                                      |                                                     |                                                    |                                                     |                                                                    |                                                    |

**Comparison of the 2D coordination polymers of compounds 3 and 4**

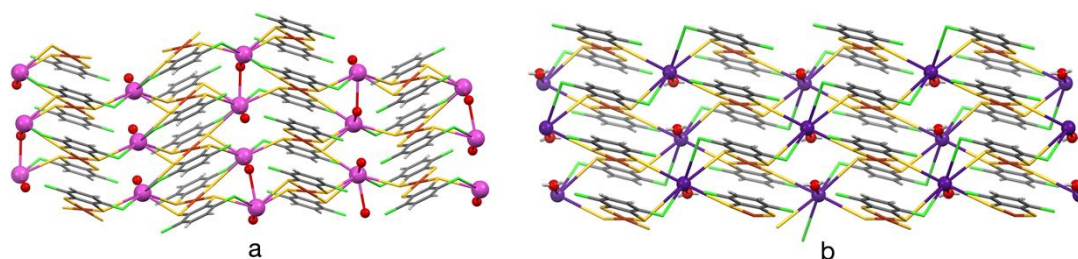

**Figure S1.** Comparative view of the polymeric layers  $\{[M(OH_2)][Cu(SC_6H_2Cl_2S)_2]\}_n$  in compounds 3 (a) and 4 (b).

**Disorder of compounds 3 and 6**

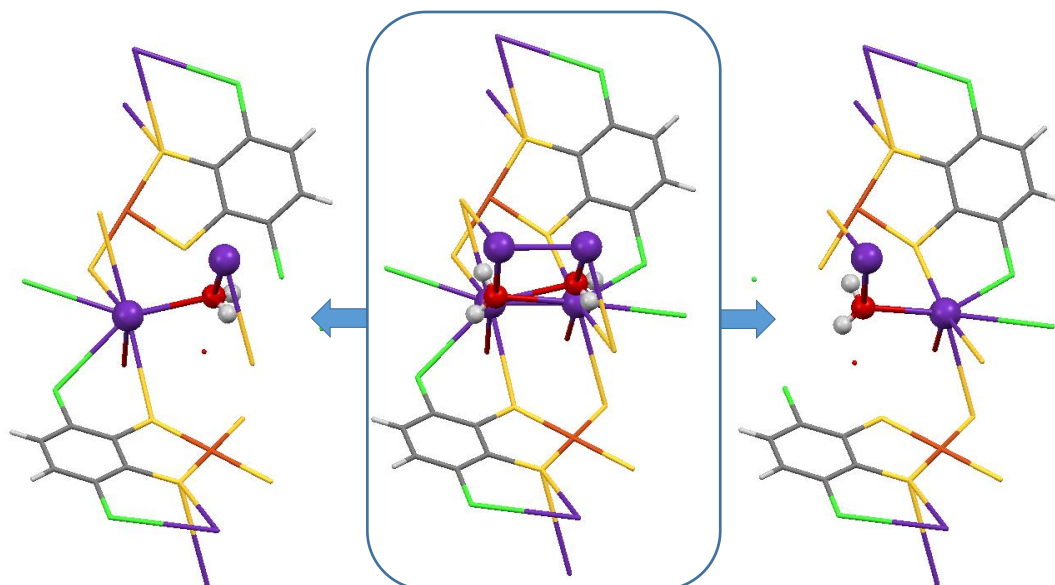

**Figure S2.** Detail of the disordered structure in the middle and two of the possibilities for the statistical occupation of the atom sites at the sides.

### Topological analysis of compound 4

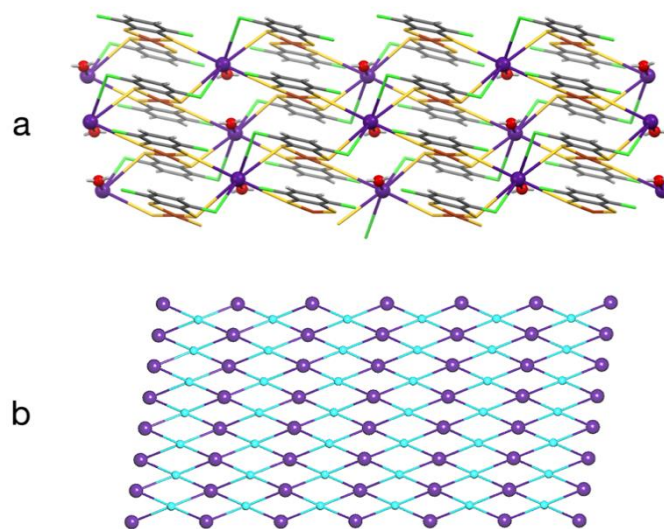

**Figure S3.** Topological simplification of the structure of compound **4**: (a) view of the polymeric layer  $\{[\text{Cs}(\text{OH}_2)][\text{Cu}(\text{SC}_6\text{H}_2\text{Cl}_2\text{S})_2]\}_n$  in compound **4**; (b) projection in the [010] direction of the underlying 2D net with the anionic  $[\text{Cu}(\text{SC}_6\text{H}_2\text{Cl}_2\text{S})_2]^-$  fragments depicted as cyan spheres and the  $\text{Cs}^+$  cations as purple balls.

## Electrical Characterization

Direct current (dc) electrical conductivity measurements were performed on different single crystals of compound **4** and pellets of compounds **3** and **4**. The compounds were electrically contacted, with two-contacts and graphite paste. The contacts were made with wolframium wires (25  $\mu\text{m}$  diameter). Measurements were carried out at 300 K applying an electrical current with voltages ranging from +10 to -10 V. The samples were measured in a design equipment connected to an external voltage source (Keithley model 2400 source-meter) and amperometer (Keithley model 6514 electrometer). All the conductivity quoted values have been measured in the voltage range where the crystals are Ohmic conductors.

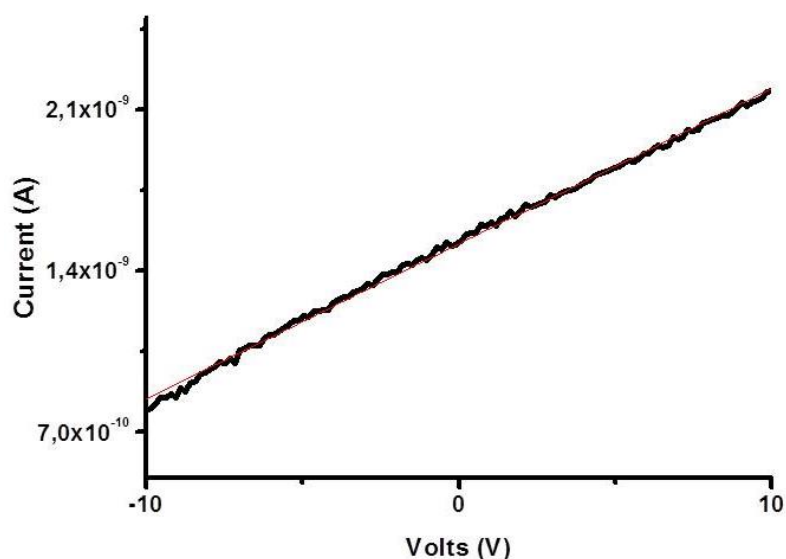

**Figure S4.** Current *versus* voltage measurements on a crystal of compound **4** at 300 K.

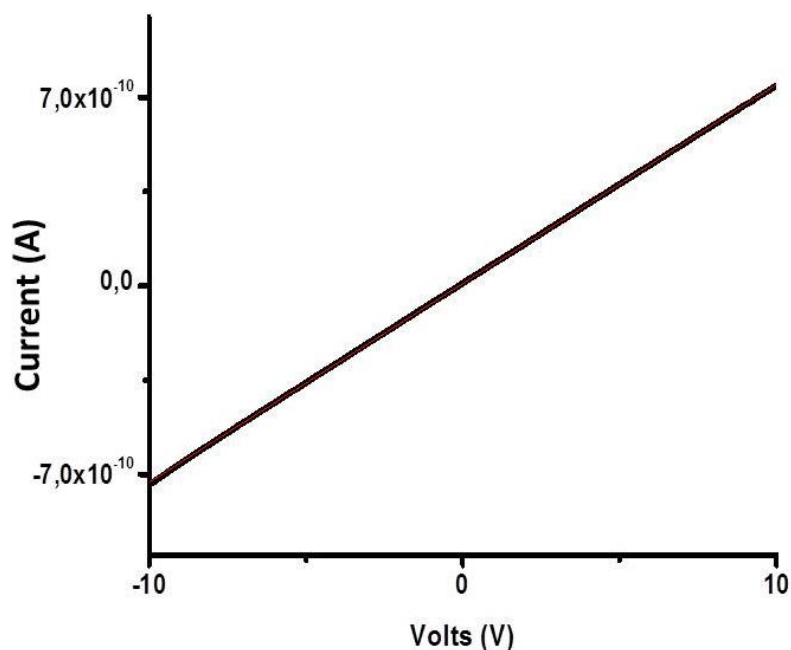

**Figure S5.** Current *versus* voltage measurements on a pellet of compound **4** at 300 K.

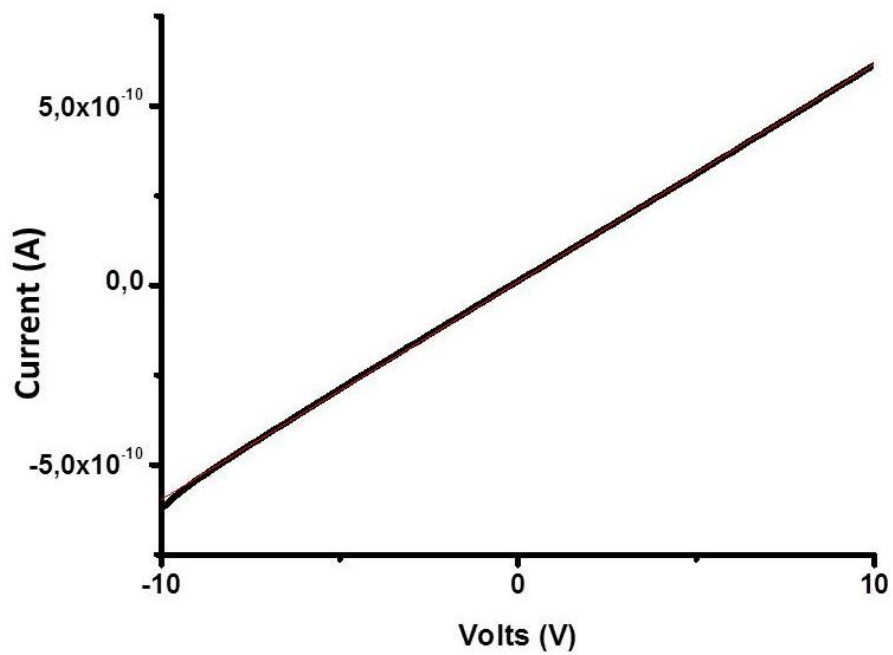

**Figure S6.** Current *versus* voltage measurements on a pellet of compound **3** at 300 K.
